# Supplementary material for: The epidemiology of neurocognitive disorders in Hungary
Source: Research Square preprint supplement (doi:10.21203/rs.3.rs-6580199/v1), 2025-05-09
Supplement: Supplementary file 1 [file ebeefa72a482b40c2d580acc.xlsx]

## Sheet: Supplementary Table 1
Primary dementia diagnoses
ICD-10 code	Diagnosis
A52.30	Neurosyphilis, unspecified
F00.00	Dementia in Alzheimer disease with early onset G30.0
F00.10	Dementia in Alzheimer disease with late onset G30.1
F00.20	Dementia in Alzheimer disease, atypical or mixed type G30.8
F01.00	Vascular dementia
F01.10	Multi-infarct dementia
F01.20	Subcortical vascular dementia
F01.30	Mixed cortical and subcortical vascular dementia
F01.80	Other vascular dementia
F01.90	Vascular dementia, unspecified
F02.00	Dementia in Pick disease
F02.10	Dementia in Creutzfeldt-Jakob disease
F02.20	Dementia in Huntington disease
F02.30	Dementia in Parkinson disease
F02.40	Dementia in human immunodeficiency virus [HIV] disease
F02.80	Dementia in other diseases classified elsewhere, unspecified severity
F03.H0	Unspecified dementia
F06.70	Mild cognitive disorder
G30.00	Alzheimer's disease with early onset
G30.10	Alzheimer's disease with late onset
G30.80	Other Alzheimer's disease
G30.90	Alzheimer's disease, unspecified
G31	Other degenerative diseases of nervous system, not elsewhere classified
G31.00	Frontotemporal dementia
G31.10	Senile degeneration of brain, not elsewhere classified
G31.80	Other specified degenerative diseases of nervous system
G31.90	Degenerative disease of nervous system, unspecified
Comorbidity diagnosis
ICD-10 code	Diagnosis
A81	Atypical virus infections of central nervous system
A81.00	Creutzfeldt-Jakob disease
A81.10	Subacute sclerosing panencephalitis
A81.20	Progressive multifocal leukoencephalopathy
A81.80	Other atypical virus infections of central nervous system
A81.90	Atypical virus infection of central nervous system, unspecified
E10	Type 1 diabetes mellitus
E11	Type 2 diabetes mellitus
E13	Other specified diabetes mellitus
E14	Unspecified diabetes mellitus
E51.20	Wernicke encephalopathy
E65-E68	Obesity and other hyperalimentation
E78	Disorders of lipoprotein metabolism and other lipidaemias
F10.10	Alcohol abuse, uncomplicated
F10.20	Alcohol dependence, uncomplicated
F10.30	Mental and behavioural disorders due to use of alcohol withdrawal state
F10.40	Mental and behavioural disorders due to use of alcohol withdrawal state with delirium
F10.50	Mental and behavioural disorders due to use of alcohol : psychotic disorder
F10.60	Mental and behavioural disorders due to use of alcohol : amnesic syndrome
F10.70	Mental and behavioural disorders due to use of alcohol : residual and late-onset psychotic disorder
F10.80	Mental and behavioural disorders due to use of alcohol : other mental and behavioural disorders
F10.90	Mental and behavioural disorders due to use of alcohol : unspecified mental and behavioural disorder
F32	Depressive episode
G12.20	Motor neuron disease
G20.H0	Parkinson disease
G21.10	Other drug-induced secondary parkinsonism
G21.80	Other secondary parkinsonism
G21.90	Secondary parkinsonism, unspecified
G22H0	Parkinsonism in diseases classified elsewhere
G23.00	Hallervorden-Spatz disease
G23.10	Progressive supranuclear ophthalmoplegia [Steele-Richardson-Olszewski]
G23.20	Striatonigral degeneration
G25.00	Essential tremor
G25.90	Extrapyramidal and movement disorder, unspecified
G26H0	Extrapyramidal and movement disorders in diseases classified elsewhere
G45.40	Transient global amnesia
G91.20	Normal-pressure hydrocephalus
G40	Epilepsy
G41	Status epilepticus
I10-15	Hypertensive diseases
I05	Rheumatic mitral valve diseases
I09.90	Rheumatic heart disease, unspecified
I20	Angina pectoris
I21	Acute myocardial infarction
I22	Subsequent myocardial infarction
I23	Certain current complications following acute myocardial infarction
I48	Atrial fibrillation and flutter
I50	Heart failure
I63	Cerebral infarction
I64	Stroke, not specified as haemorrhage or infarction
I66	Occlusion and stenosis of cerebral arteries, not resulting in cerebral infarction
I74	Arterial embolism and thrombosis
I67.60	Nonpyogenic thrombosis of intracranial venous system
I80	Phlebitis and thrombophlebitis
I81	Portal vein thrombosis
I82	Other venous embolism and thrombosis
I97.10	Other functional disturbances following cardiac surgery
K04.4	Diaphragmatic hernia
K04.5	Other abdominal hernia

## Sheet: Supplementary Table 2
Prevalence of NCD by age-group
Male - Prevalence
YEAR	under 65	65-69	70-74	75-79	80+	65+
2016	21353	6617	7480	7732	13987	35816
2017	20289	6674	7509	8058	14069	36310
2018	19585	6818	7390	8323	13949	36480
2019	18151	6802	7326	8476	14008	36612
2020	15990	6391	6831	7841	13218	34281
2021	14495	6130	6800	7598	12809	33337
Female - Prevalence
YEAR	under 65	65-69	70-74	75-79	80+	65+
2016	25604	9432	12285	17343	44449	83509
2017	24359	9432	12271	17411	45196	84310
2018	23226	9508	12291	17215	45543	84557
2019	21472	9707	12028	17416	45331	84482
2020	18711	8922	11506	15868	43273	79569
2021	16907	8428	11406	15319	41852	77005
Female to male ratio
YEAR	under 65	65-69	70-74	75-79	80+	65+
2016	1.19908	1.42542	1.64238	2.24302	3.17788	2.33161
2017	1.2006	1.41325	1.63417	2.16071	3.21245	2.32195
2018	1.18591	1.39454	1.66319	2.06836	3.26497	2.3179
2019	1.18297	1.42708	1.64182	2.05474	3.23608	2.30749
2020	1.17017	1.39603	1.68438	2.02372	3.27379	2.32108
2021	1.1664	1.37488	1.67735	2.01619	3.26739	2.3099

## Sheet: Supplementary Table 3
Prevalence of comorbidity in incident cases of NCD
Disease	2016	2017	2018	2019	2020	2021
Hypertension	0.7981	0.8011	0.8024	0.8047	0.7952	0.8023
Cerebrovascular disease	0.7514	0.709	0.6721	0.6831	0.6014	0.5925
Dyslipidaemia	0.3581	0.3488	0.3453	0.3436	0.3332	0.3379
Diabetes mellitus	0.334	0.3409	0.3404	0.3469	0.3338	0.3445
Angina pectoris	0.2064	0.2029	0.1978	0.1962	0.1841	0.1877
Heart failure	0.191	0.1937	0.1916	0.1897	0.1913	0.1898
Depressive episode	0.187	0.1818	0.1752	0.1659	0.1661	0.161
Atrial fibrillation	0.121	0.1295	0.1361	0.1401	0.1446	0.1483
Epilepsy	0.0632	0.0604	0.0589	0.0591	0.0596	0.0572
Parkinson’s disease	0.0587	0.0577	0.0545	0.0537	0.0479	0.0474
Mental and behavioural disorders caused by the consumption of alcohol	0.0515	0.051	0.0507	0.047	0.0473	0.0448

## Sheet: Supplementary Table 4
Rate of given diagnostic procedure in incident cases of NCD in the year of or in the year preceding diagnosis
Diagnostic procedure	2016	2017	2018	2019	2020	2021
Neuropsychological testing	0.589941	0.593343	0.584618	0.593797	0.580489	0.589481
Serum level of thyroid stimulating hormone	0.470274	0.489293	0.505689	0.530003	0.508919	0.518338
Computer Tomography scan of the head	0.336183	0.363156	0.374018	0.393353	0.387025	0.399601
Serum vitamin B12 level	0.0611158	0.0727659	0.0864344	0.101114	0.0971253	0.113407
Magnetic Resonance Imaging of the head	0.0472564	0.0549756	0.0580801	0.0653407	0.0593755	0.0672224
Serum folate level	0.0442494	0.0526461	0.0617865	0.0747006	0.0731417	0.0859357
Electroencephalography	0.0341143	0.0354425	0.0326723	0.0346038	0.0286994	0.0282695
Rapid plasma reagin test	0.00402961	0.00396873	0.00366938	0.00388673	0.00312001	0.00255929
Serum copper level	0.00268641	0.00276086	0.00290956	0.00243912	0.00226261	0.0017375
Total protein level in cerebrospinal fluid	0.00265588	0.00257105	0.00302076	0.0038669	0.00292948	0.00267668
